# Supplementary material for: A NIR-Activated and Mild-Temperature-Sensitive Nanoplatform with an HSP90 Inhibitor for Combinatory Chemotherapy and Mild Photothermal Therapy in Cancel Cells
Source: MDPI journal article supplement (doi:10.3390/pharmaceutics15092252), 2023-08-31
Supplement: s1 [file s1]

# Supplementary Material: A NIR-Activated and Mild-Temperature-Sensitive Nanoplatfom with HSP90 Inhibitor for Combinatory Chemo- and Mild Photothermal Therapy in Cancer Cells

Yingying Peng, Hanlin Jiang, Bifei Li, Yue Liu, Bing Guo and Wei Gan

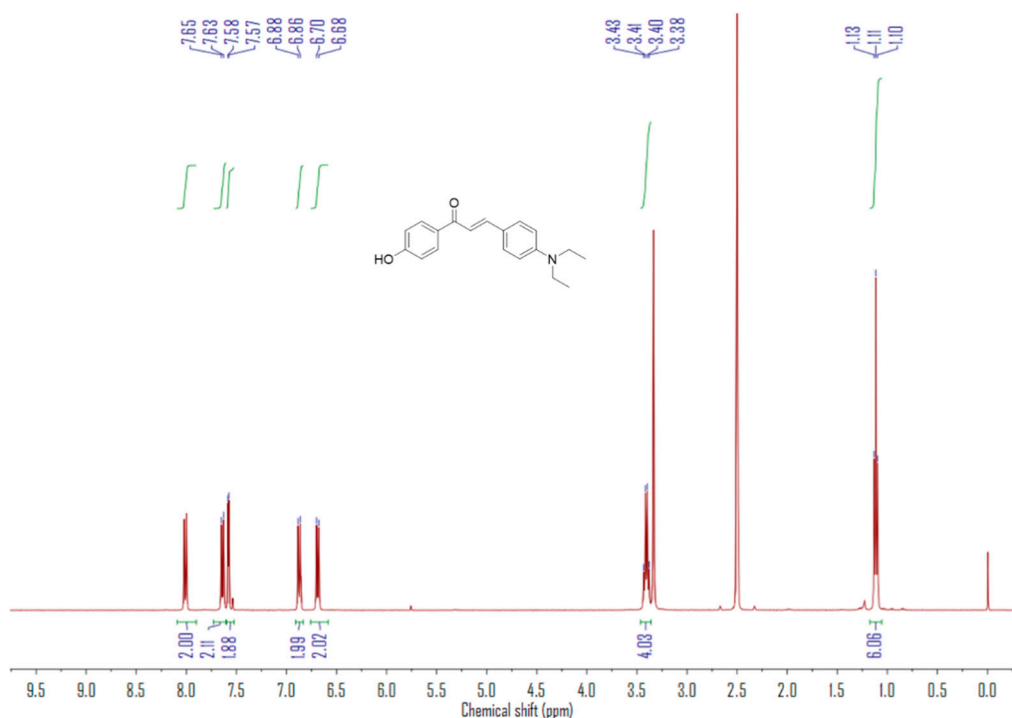

**Figure S1.** The <sup>1</sup>H NMR spectrum of compound 3 in DMSO-*d*<sub>6</sub>.

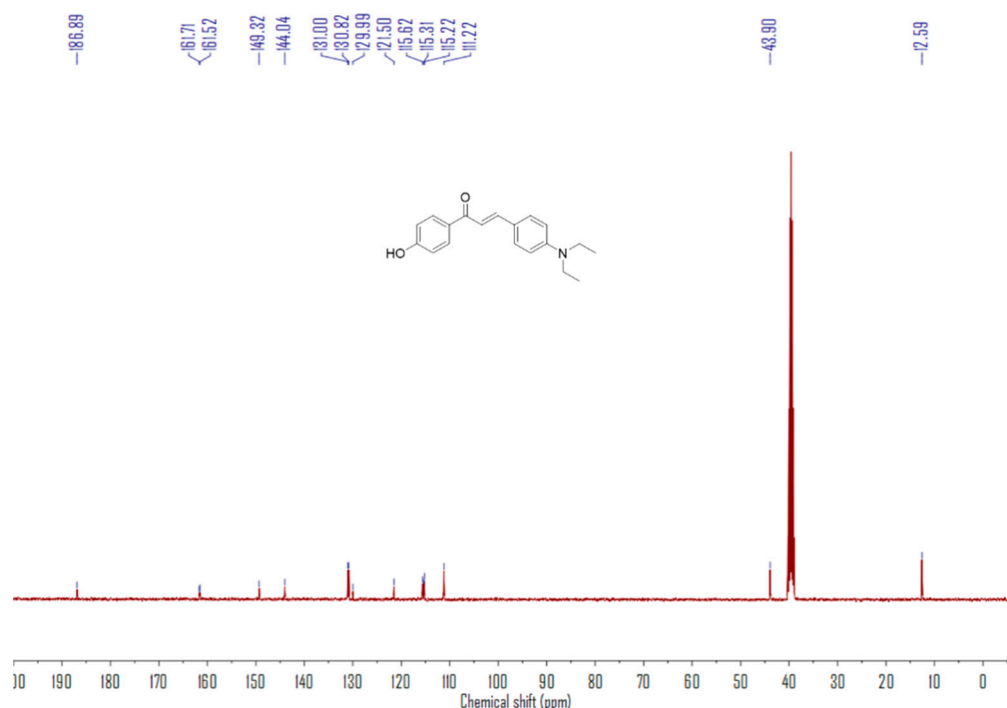

**Figure S2.** The <sup>13</sup>C NMR spectrum of compound 3 in DMSO-*d*<sub>6</sub>.

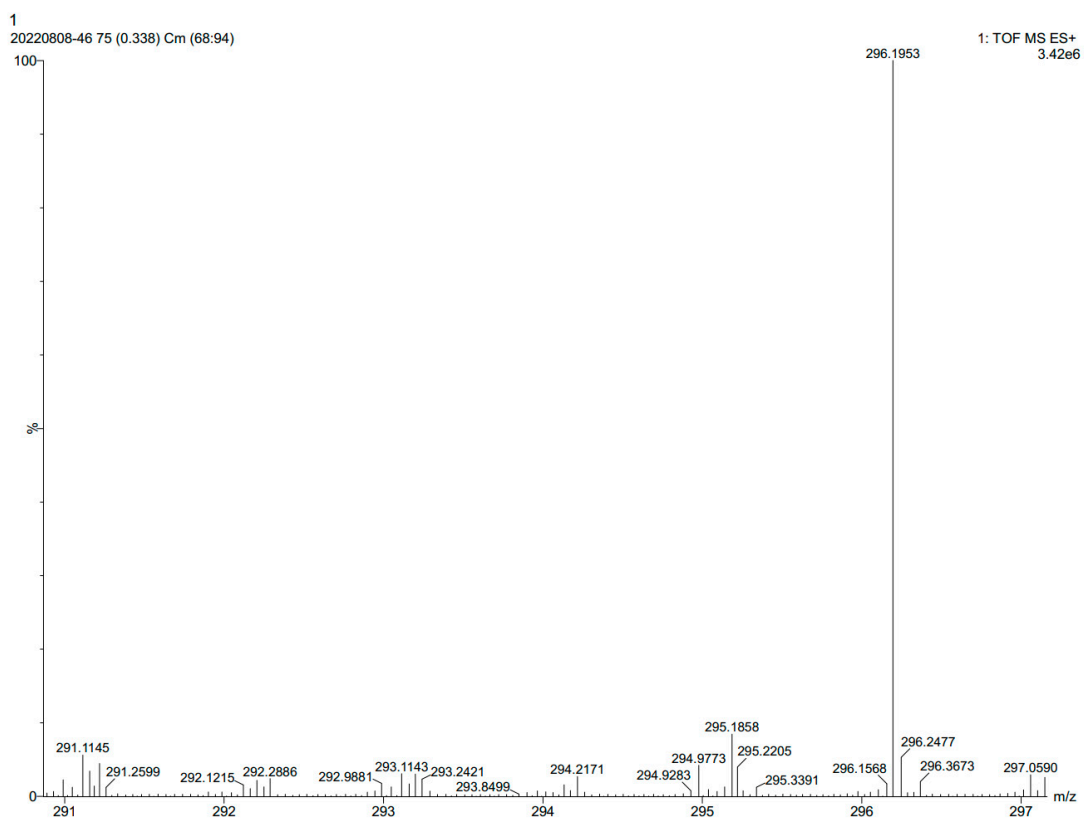

**Figure S3.** ESI-Mass spectrum of compound **3**.

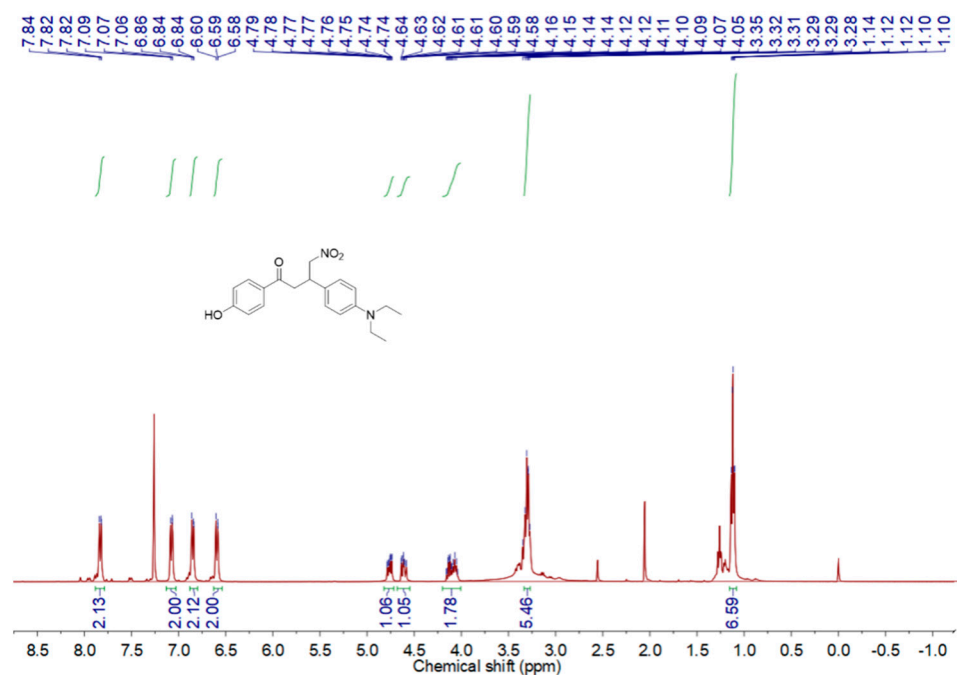

**Figure S4.** The  $^1\text{H}$  NMR spectrum of compound **4** in  $\text{CDCl}_3$ .

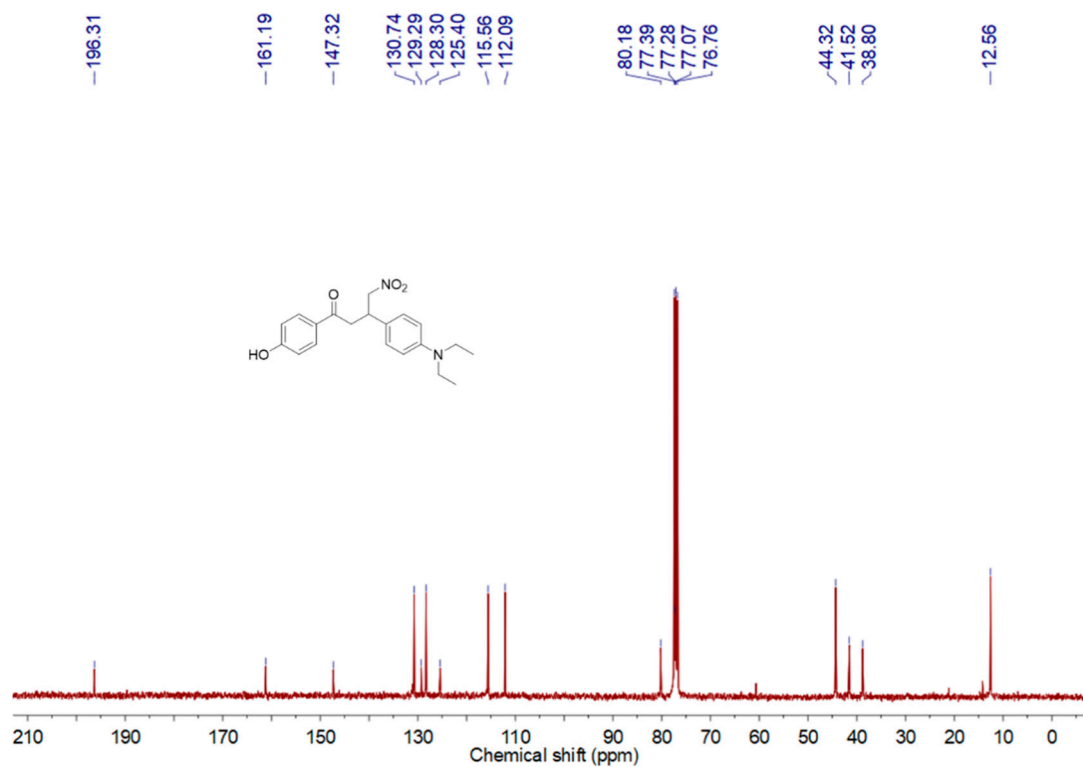

Figure S5. The <sup>13</sup>C NMR spectrum of compound 4 in CDCl<sub>3</sub>.

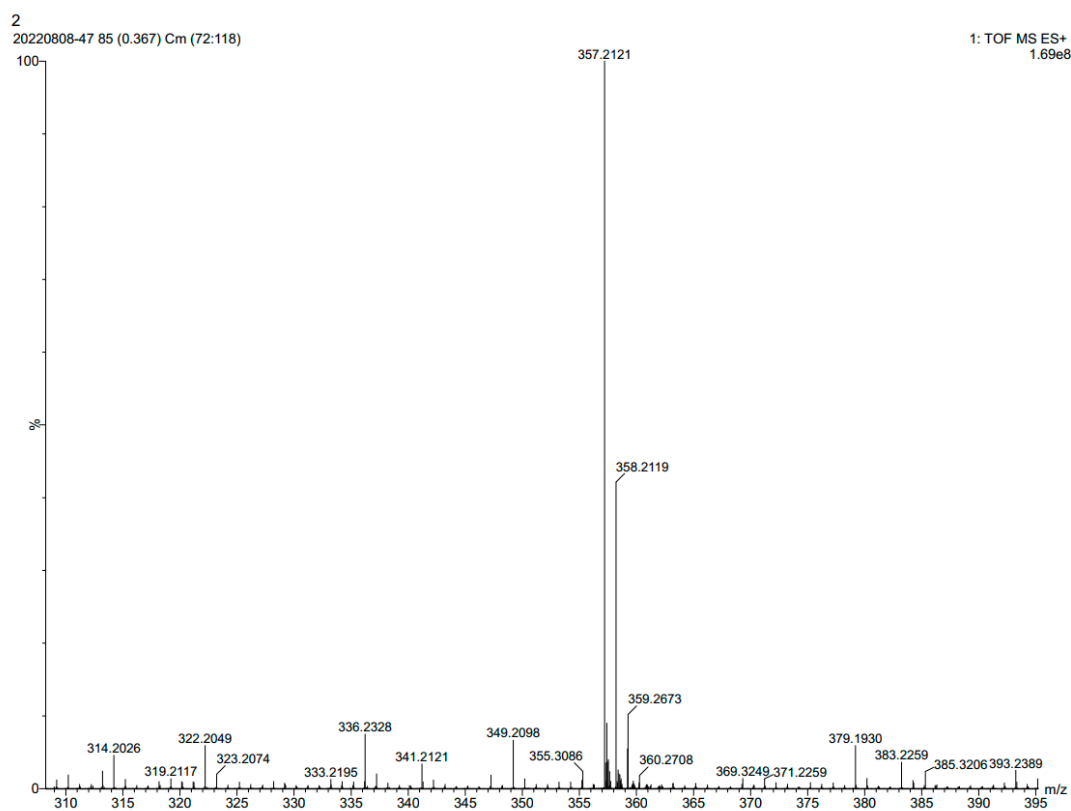

Figure S6. ESI-Mass spectrum of compound 4.

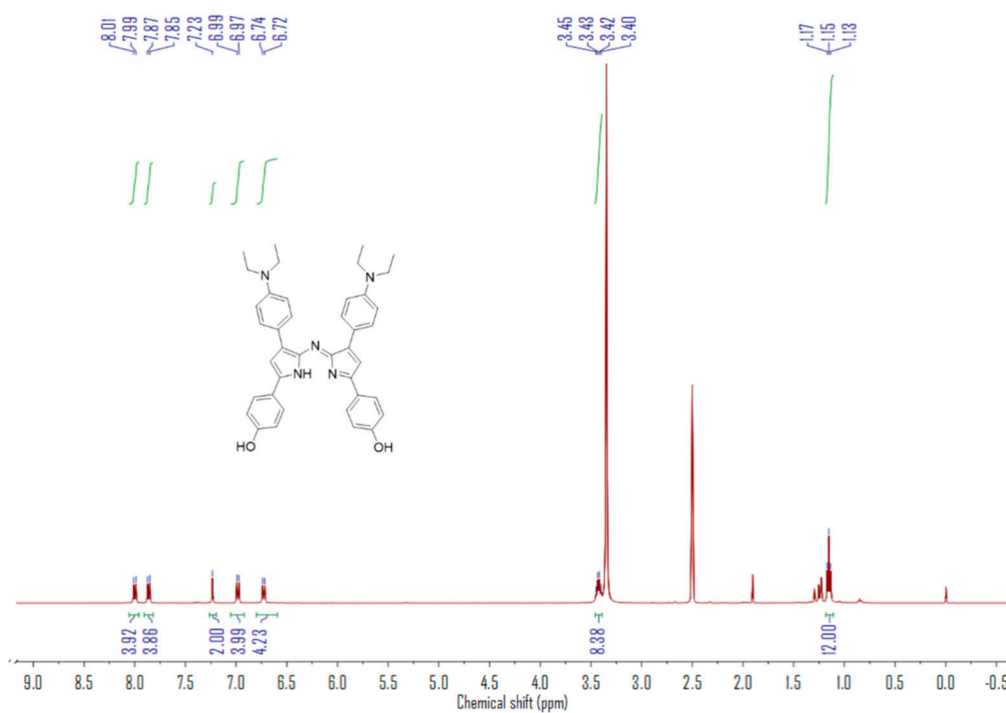

**Figure S7.** The <sup>1</sup>H NMR spectrum of compound 5 in DMSO-*d*<sub>6</sub>.

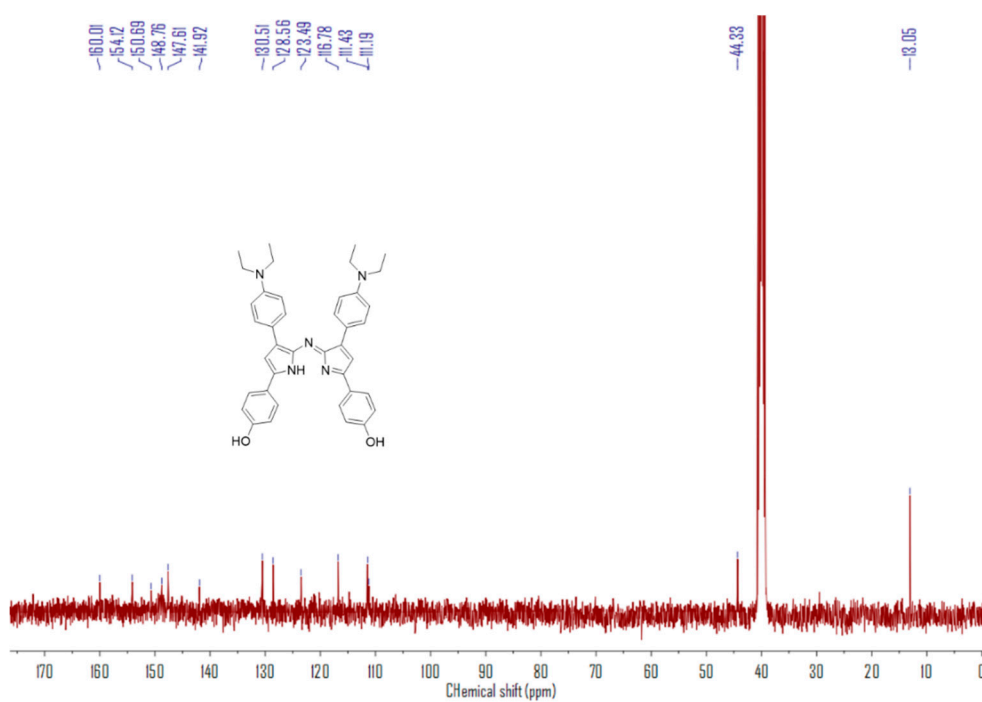

**Figure S8.** The <sup>13</sup>C NMR spectrum of compound 5 in DMSO-*d*<sub>6</sub>.

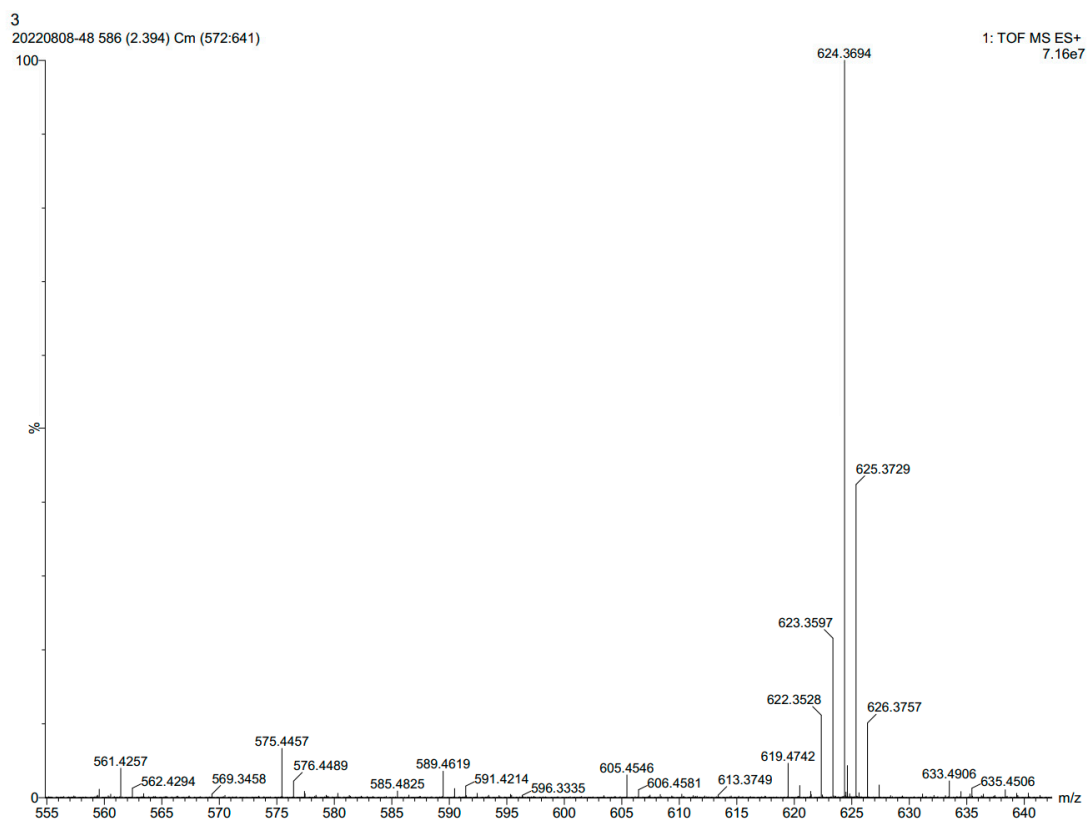

Figure S9. ESI-Mass spectrum of compound 5.

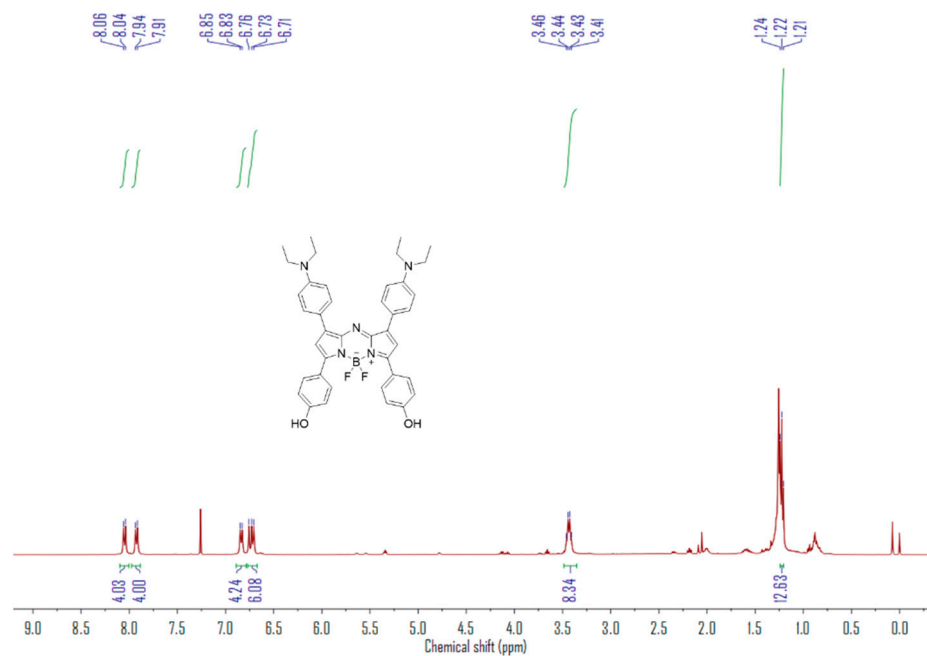

Figure S10. The  $^1\text{H}$  NMR spectrum of BDPII in  $\text{CDCl}_3$ .

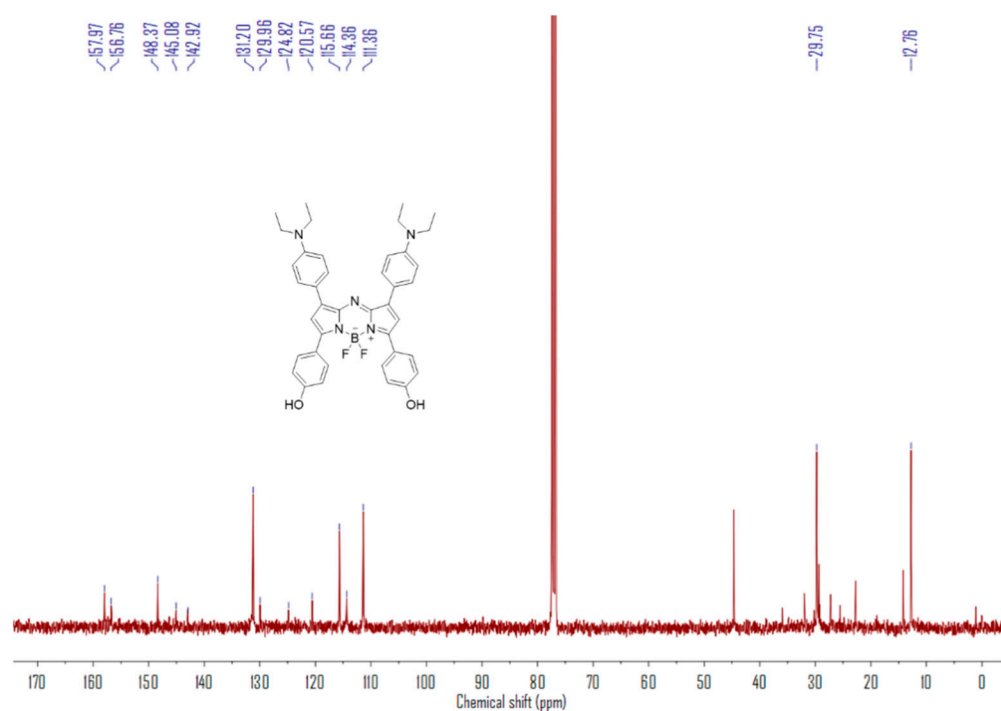

**Figure S11.** The  $^{13}\text{C}$  NMR spectrum of BDPII in  $\text{CDCl}_3$ .

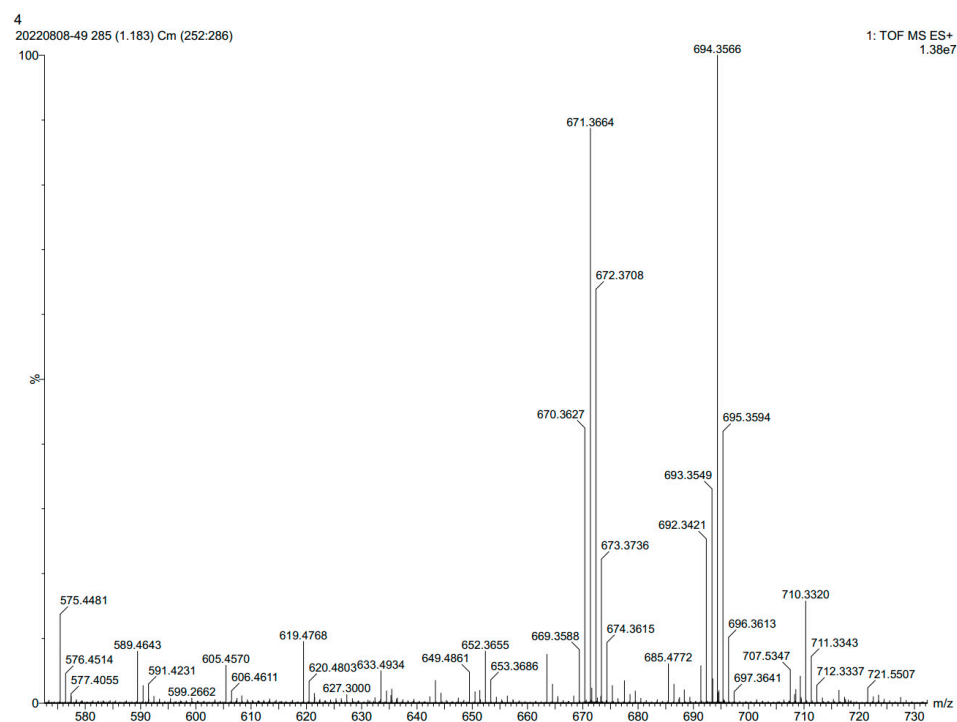

**Figure S12.** ESI-Mass spectrum of BDPII.

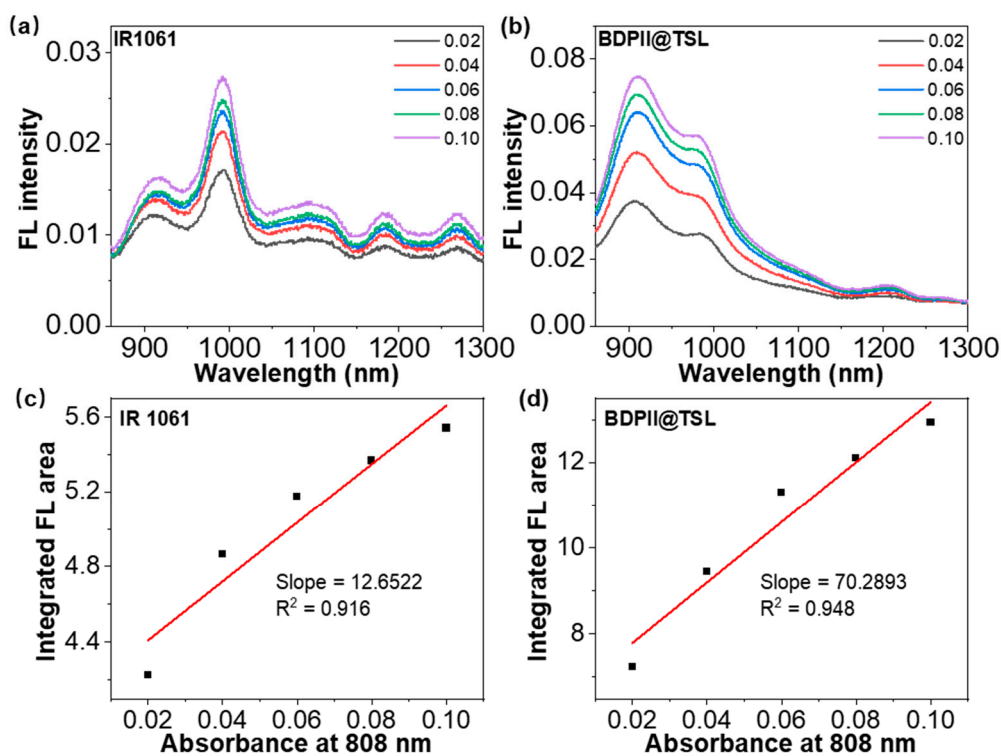

**Figure S13.** The emission spectra of the (a) IR1061 solution and (b) BDPII@TSL NPs with different concentration upon 808 nm excitation (Legend: the absorbance at 808 nm for the corresponding sample solution). The integrated fluorescence emission area at 900-1300 nm as a function of absorbance at 808 nm of (c) IR1061 and (d) BDPII@TSL solutions.

**Table S1.** The average diameter of BDPII@TSL and BDPII-gel@TSL in water, PBS and DMEM with 4 °C storage for 15 days.

| In Water      |                 |                 |                  |                  |
|---------------|-----------------|-----------------|------------------|------------------|
| Compound      | 1 <sup>st</sup> | 5 <sup>th</sup> | 10 <sup>th</sup> | 15 <sup>th</sup> |
| BDPII@TSL     | 117±1.63 nm     | 11±0.86 nm      | 115±3.32 nm      | 112±1.28 nm      |
| BDPII-gel@TSL | 139±0.34 nm     | 139±1.24 nm     | 134±2.20 nm      | 1±1.98 nm        |
| In PBS        |                 |                 |                  |                  |
| Compound      | 1 <sup>st</sup> | 5 <sup>th</sup> | 10 <sup>th</sup> | 15 <sup>th</sup> |
| BDPII@TSL     | 135±1.69 nm     | 138±1.30 nm     | 145±2.58 nm      | 144±0.74 nm      |
| BDPII-gel@TSL | 138±1.25 nm     | 137±0.62 nm     | 136±2.31 nm      | 136±2.12 nm      |
| In DMEM       |                 |                 |                  |                  |
| Compound      | 1 <sup>st</sup> | 5 <sup>th</sup> | 10 <sup>th</sup> | 15 <sup>th</sup> |
| BDPII@TSL     | 155±1.81 nm     | 156±2.06 nm     | 153±1.17 nm      | 153±1.62 nm      |
| BDPII-gel@TSL | 137±1.45 nm     | 140±1.17 nm     | 152±1.34 nm      | 154±1.49 nm      |

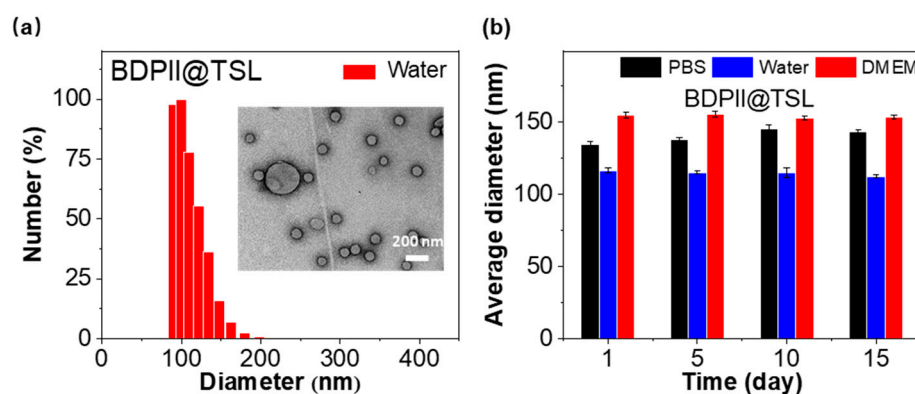

**Figure S14.** (a) The size distribution of BDPII@TSL NPs measured by dynamic light scattering as well as the particles morphology for BDPII@TSL NPs detected by transmission electron microscopy (inner) with a white scale bar of 200 nm. (b) The average diameter of BDPII@TSL NPs in water, PBS and DMEM with 4 °C storage for 15 days.



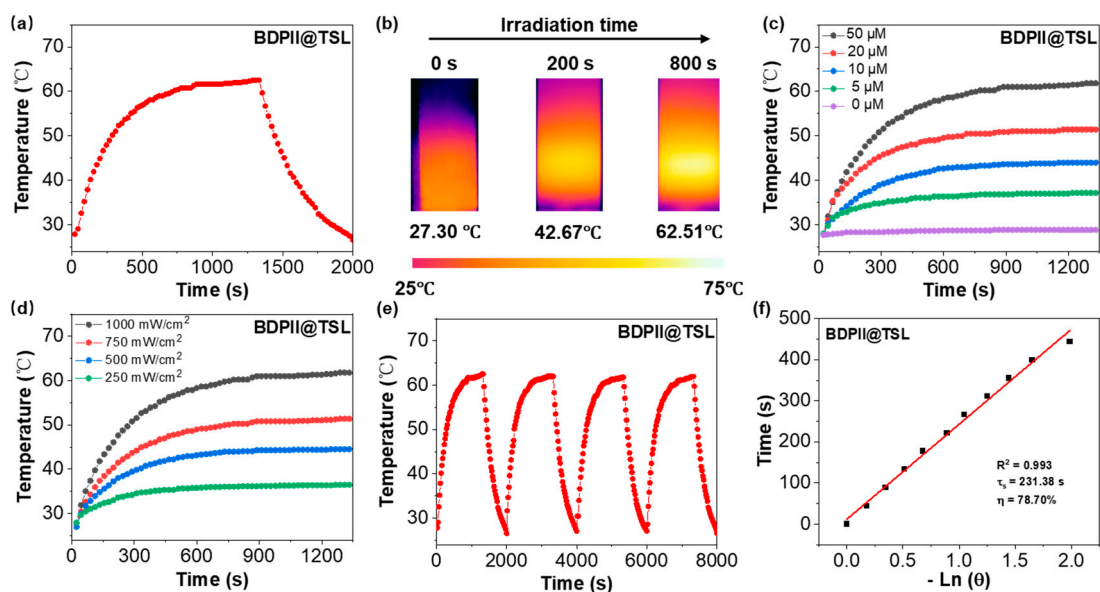

**Figure S15.** (a) Photothermal heating effect for BDPII@TSL in water (40  $\mu\text{M}$ ) upon 808 nm irradiation with  $1 \text{ W cm}^{-2}$  laser power followed by the cooling process to room temperature. (b) The infrared photos for BDPII@TSL NPs at different irradiation time ( $1 \text{ W cm}^{-2}$ , 808 nm). The photothermal heating profiles for BDPII@TSL NPs with different (c) concentration ( $1 \text{ W cm}^{-2}$ , 808 nm) and (d) laser power density (40  $\mu\text{M}$ , 808 nm). (e) Photothermal stability for BDPII@TSL NPs (40  $\mu\text{M}$ ) upon 808 nm irradiation with laser power of  $1 \text{ W cm}^{-2}$  for four switching on/off cycles. (f) The plot of the negative natural logarithm of driving force temperature versus the cooling time for BDPII@TSL in the photothermal heating process.

**Table S2.** The average fluorescence intensity for HeLa cells incubated with calcein-AM (green)/PI (red) and no particles (control), geldanamycin, BDPII@TSL and BDPII-gel@TSL NPs without and with 808 nm irradiation for 30 min.

| With light        |         |              |           |               |
|-------------------|---------|--------------|-----------|---------------|
| Compound          | control | geldanamycin | BDPII@TSL | BDPII-gel@TSL |
| green             | 148.09  | 107.87       | 32.54     | 5.98          |
| red               | 0.34    | 46.67        | 98.79     | 139.68        |
| Ratio (red/green) | 0.00    | 0.43         | 3.04      | 23.36         |
| Without light     |         |              |           |               |
| Compound          | control | geldanamycin | BDPII@TSL | BDPII-gel@TSL |
| green             | 147.98  | 96.14        | 149.33    | 151.28        |
| red               | 0.12    | 39.87        | 1.20      | 21.98         |
| Ratio (red/green) | 0.00    | 0.41         | 0.00      | 0.15          |
